# Supplementary material for: Lipopolysaccharide Lowers Cholesteryl Ester Transfer Protein by Activating F4/80+Clec4f+Vsig4+Ly6C− Kupffer Cell Subsets
Source: PubMed Central journal article supplement (PMC5907564; doi:10.1161/jaha.117.008105), 2018-03-10
Supplement: JAH3-7-e008105-s001.pdf [file JAH3-7-e008105-s001.pdf]

# **SUPPLEMENTAL MATERIAL**

**Table S1. Primers sequences use for RT-Qpcr.**

| <b>Gene</b>                    | <b>Forward primer</b>        | <b>Reverse primer</b>      |
|--------------------------------|------------------------------|----------------------------|
| <i>ABCG1</i>                   | CAGGAAGATTAGACACTGTGG        | GAAAGGGGAATGGAGAGAAGA      |
| <i>Abcg1</i>                   | AGGTCTCAGCCTTCTAAAGTTCCTC    | TCTCTCGAAGTGAATGAAATTTATCG |
| <i><math>\beta</math>actin</i> | AACCGTGAAAAGATGACCCAGAT      | CACAGCCTGGATGGCTACGTA      |
| <i><math>\beta</math>-2m</i>   | TGACCGGCTTGTATGCTATC         | CAGTGTGAGCCAGGATATAG       |
| <i>CETP</i>                    | CATGTCTCGGCTCGAGGTAG         | TTCTGCTACAAGCCCCATCC       |
| <i>Clec4f</i>                  | ACTGAAGTACCAAATGGACAATGTTAGT | GTCAGCATTACATCCTCCAGA      |
| <i>F4/80</i>                   | CTTTGGCTATGGGCTTCCAGTC       | GCAAGGAGGACAGAGTTTATCGTG   |
| <i>Hprt</i>                    | TTGCTCGAGATGTCATGAAGGA       | AGCAGGTCAGCAAAGAACTTATAG   |
| <i>Il-1<math>\beta</math></i>  | GCAACTGTTCTGAACTCAACT        | ATCTTTTGGGGTCCGTCAACT      |
| <i>Lbp</i>                     | CCTGAGACTCGCCATCTCTGA        | AGGAGGAGGTCCACTGAAATG      |
| <i>Ly6c</i>                    | CTGCAACCTTGTCTGAGAGGA        | GTCCCTGAGCTCTTTCTGCAC      |
| <i>Mcp-1</i>                   | GCATCTGCCCTAAGGTCTTCA        | TTCACTGTCACACTGGTCACTCCTA  |
| <i>Pltp</i>                    | TCAGTCTGCGCTGGAGTCTCT        | AAGGCATCACTCCGATTTGC       |
| <i>Tnfa</i>                    | AGCCACGTCGTAGCAAACCAC        | TCGGGGCAGCCTTGTCCCTT       |
| <i>Vsig4</i>                   | TCACCTATGGCCACCCCACC         | AGGCGGCCTCTGTACTTTGCCT     |
| <i>VSIG4</i>                   | CACTGACATGGATGGCTACCT        | AAGACAGGCAGGCTCTTTCC       |

**Figure S1. CETP staining in mouse and human livers.**

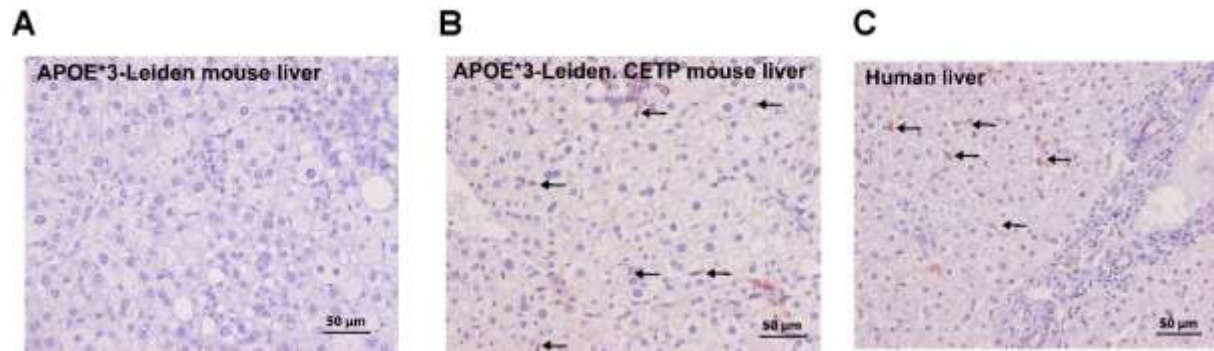

Representative pictures of IHC staining of CETP protein in liver sections of (A) non-CETP transgenic mice (APOE\*3-Leiden mice), (B) APOE\*3-Leiden.CETP transgenic mice, and (C) a healthy human donor.

**Figure S2. LPS acutely increases hepatic *Lbp* expression and decreases *Pltp* and *Abcg1* expression.**

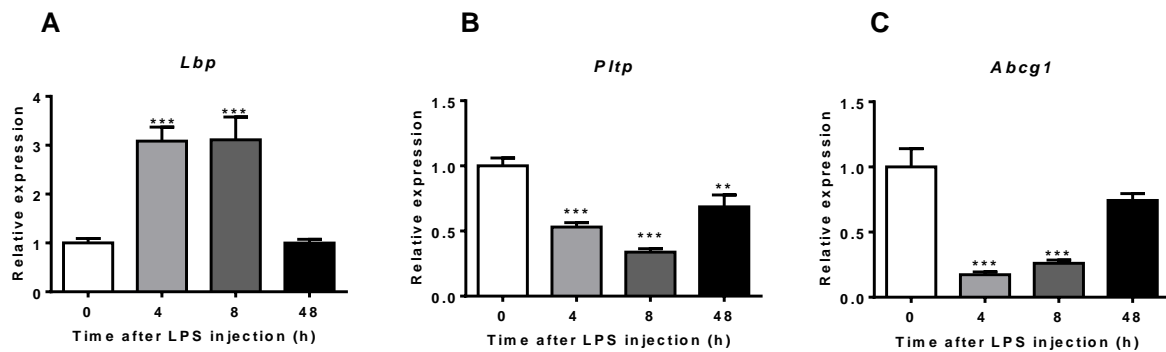

Female APOE\*3-Leiden.CETP mice fed a Western-type diet were intraperitoneally injected with 25  $\mu$ g LPS, after which mice were sacrificed at the indicated time points. Livers were assayed for mRNA of (A) *Lbp*, (B) *Pltp* and (C) *Abcg1*. Data are presented as means  $\pm$  SEM (n=7-8); \*\*P<0.01, \*\*\*P<0.001 as compared to the 0 h group.

Figure S3. LPS acutely changes hepatic macrophage subsets rather than macrophage number.

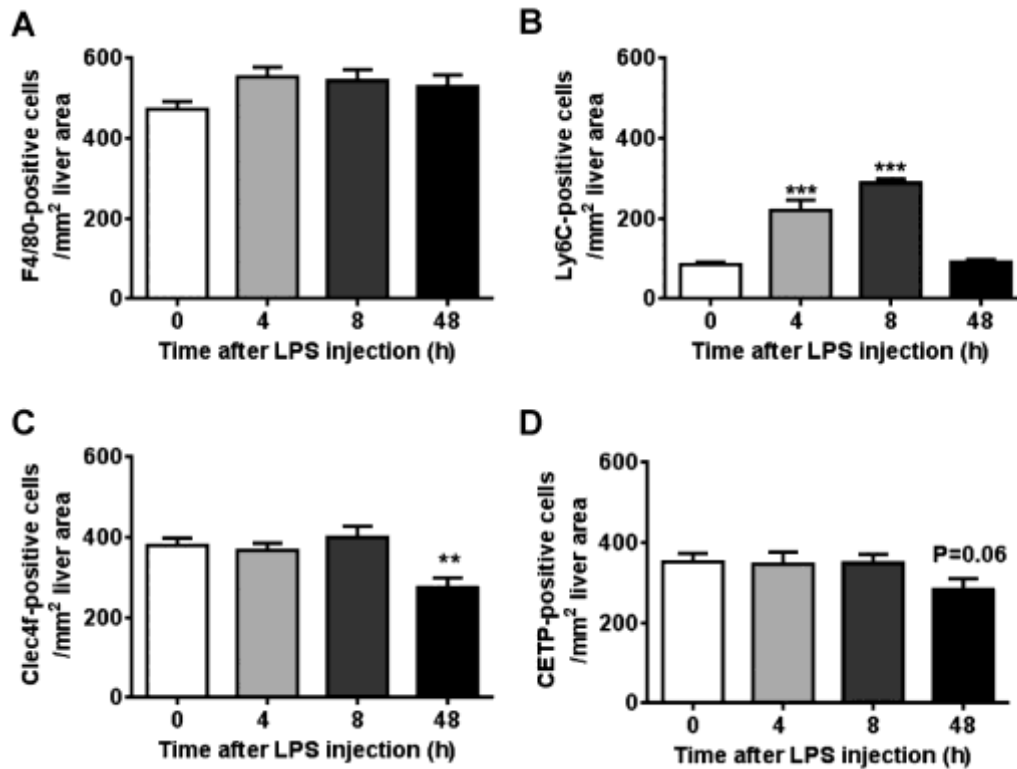

Female APOE\*3-Leiden.CETP mice fed a Western-type diet were intraperitoneally injected with 25  $\mu$ g LPS, after which mice were sacrificed at the indicated time points. Livers were assayed for F4/80-positive macrophages (A), Ly6C-positive monocytes (B), Clec4f-positive Kupffer cells (C) and CETP-positive cells (D). Data are presented as means  $\pm$  SEM (n=7-8); \*\*P<0.01, \*\*\*P<0.001 as compared to the 0 h group.

Figure S4. Hepatic *CETP* expression correlates with *VSIG4* expression in humans.

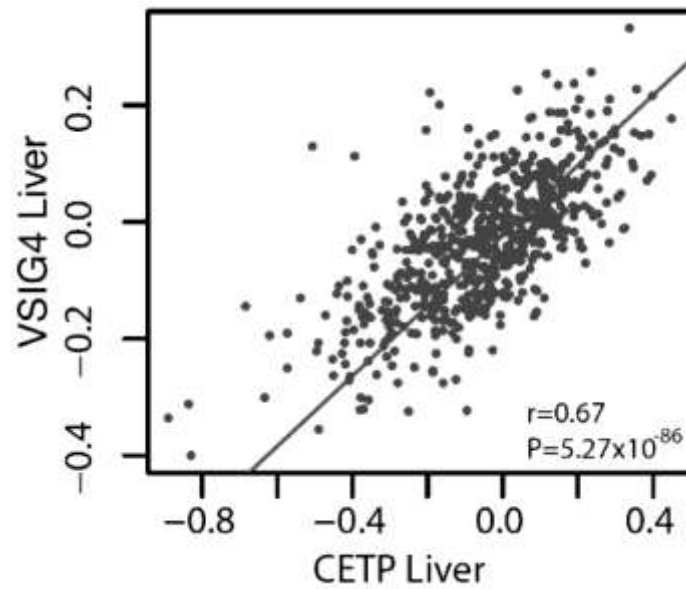

Scatter plots of the correlation between the expression of *CETP* and *VSIG4* in liver was determined by using a publicly available dataset consisting of 651 subjects<sup>1</sup>.

**Supplemental Reference:**

1. Greenawalt DM, Dobrin R, Chudin E, Hatoum IJ, Suver C, Beaulaurier J, Zhang B, Castro V, Zhu J, Sieberts SK, Wang S, Molony C, Heymsfield SB, Kemp DM, Reitman ML, Lum PY, Schadt EE, Kaplan LM. A survey of the genetics of stomach, liver, and adipose gene expression from a morbidly obese cohort. *Genome Res.* 2011;21:1008-16.
